# Supplementary material for: A novel tissue model for angiogenesis: evaluation of inhibitors or promoters in tissue level
Source: PubMed Central journal article supplement — Sci Rep. 2014 Jan 15;4:3693. doi: 10.1038/srep03693 (PMC3892440; doi:10.1038/srep03693), 2014-01-15
Supplement: srep03693-s1.pdf [file srep03693-s1.pdf]

# **A novel tissue model for angiogenesis: evaluation of inhibitors or promoters in tissue level**

**Authors:** Bingling Dai<sup>1</sup>, Yanmin Zhang<sup>1</sup>, Yingzhuan Zhan, Dongdong Zhang, Nan Wang & Langchong He\*

---

\* Corresponding author. Tel: +86 29 8265 6264; fax: +86 29 8265 5451.

E-mail address: helc@mail.xjtu.edu.cn (L.C. He)

<sup>1</sup> These authors contributed equally to this work.

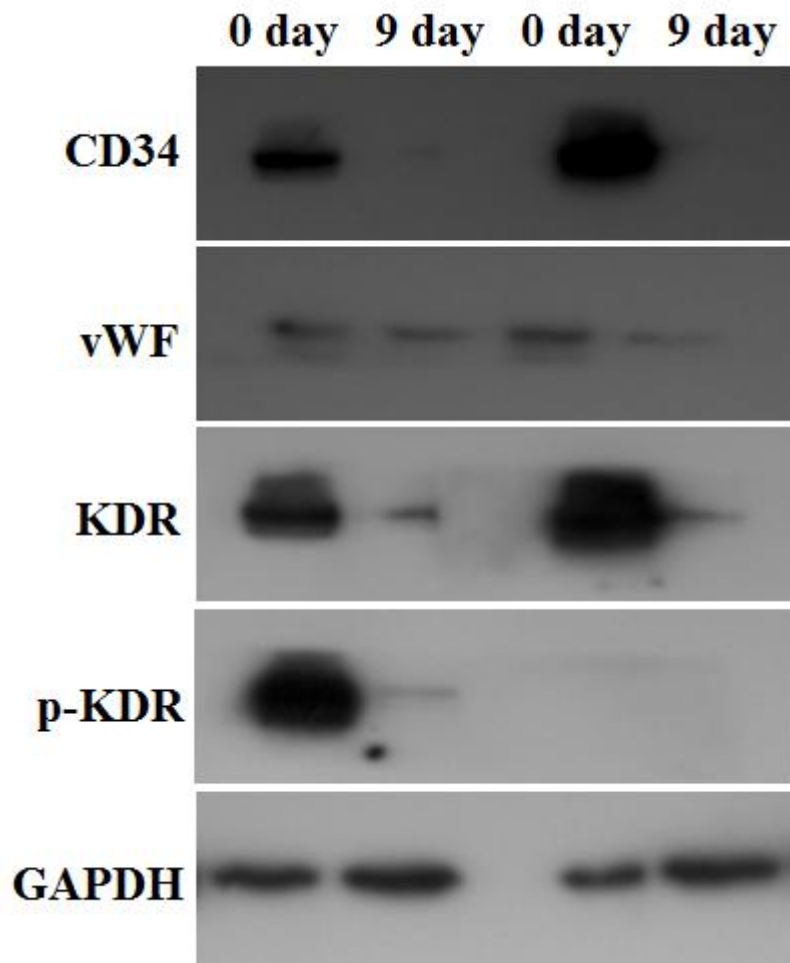

## Supplementary figure legends

**Supplementary figure 1** | Western blot analysis of CD34, vWF, KDR and p-KDR expression in fresh lung tissue (0 day) and cultured lung tissues in the TMA (cultured 9 days). Samples were run twice in the independent experiment and the experiments were repeated three times under the same experimental conditions. GAPDH was used as a control.
